# Supplementary material for: Patient characteristics, treatment patterns, and outcomes of hormone receptor-positive, human epidermal growth factor receptor 2-negative advanced breast cancer patients prescribed cyclin-dependent kinase 4 and 6 inhibitors: large-scale data analysis using a Japanese claims database
Source: Springer Nature journal article supplement (doi:10.1007/s10549-022-06816-9), 2022-11-21
Supplement: MOESM1 [file 10549_2022_6816_MOESM1_ESM.pdf]

## **Supplementary information – Online resources**

Patient characteristics, treatment patterns, and outcomes of hormone receptor-positive, human epidermal growth factor receptor 2-negative advanced breast cancer patients prescribed cyclin-dependent kinase 4 and 6 inhibitors: large-scale data analysis using a Japanese claims database

Masaaki Kawai<sup>1</sup>, Masahiro Takada<sup>2</sup>, Takahiro Nakayama<sup>3</sup>, Norikazu Masuda<sup>4</sup>, Hirokazu Shiheido<sup>5</sup>, Zhihong Cai<sup>5</sup>, Yu-Jing Huang<sup>6</sup>, Tsutomu Kawaguchi<sup>5</sup>, Yoshinori Tanizawa<sup>5</sup>

<sup>1</sup>Department of Surgery I, Yamagata University Graduate School of Medical Science, Yamagata, Japan; <sup>2</sup>Department of Breast Surgery, Kyoto University Graduate School of Medicine, Kyoto, Japan; <sup>3</sup>Department of Breast and Endocrine Surgery, Osaka International Cancer Institute, Osaka, Japan; <sup>4</sup>Department of Breast and Endocrine Surgery, Nagoya University Graduate School of Medicine, Nagoya, Japan; <sup>5</sup>Japan Drug Development and Medical Affairs, Eli Lilly Japan K.K., Kobe, Japan; <sup>6</sup>Global Patient Safety, Eli Lilly and Company, Indianapolis, Indiana, USA

**Correspondence:** Yoshinori Tanizawa, [tanizawa\\_yoshinori@lilly.com](mailto:tanizawa_yoshinori@lilly.com)

**Online Resource 1. List of breast cancer drugs for treatment pattern analysis**

| <b>Class</b>                                                    | <b>Drugs</b>                                                                                                                       |
|-----------------------------------------------------------------|------------------------------------------------------------------------------------------------------------------------------------|
| <b>Alkylating agents<sup>a</sup></b>                            | Cyclophosphamide                                                                                                                   |
| <b>Antimetabolites<sup>a</sup></b>                              | Capecitabine<br>Doxifluridine<br>Fluorouracil<br>Gemcitabine<br>Methotrexate<br>Tegafur/uracil<br>Tegafur/gimeracil/oteracil (S-1) |
| <b>Plant alkaloids and other natural products<sup>a</sup></b>   | Docetaxel<br><br>Irinotecan<br>nab-paclitaxel<br>Paclitaxel<br>Vinorelbine                                                         |
| <b>Cytotoxic antibiotics and related substances<sup>a</sup></b> | Doxorubicin<br><br>Epirubicin<br>Mitomycin C<br>Mitoxantrone                                                                       |
| <b>Platinum agents<sup>a</sup></b>                              | Carboplatin<br>Cisplatin                                                                                                           |
| <b>Other antineoplastic agents</b>                              | Bevacizumab <sup>a</sup><br>Eribulin <sup>a</sup><br>Everolimus<br>Olaparib <sup>a</sup>                                           |
| <b>Anticancer drugs – CDK4 and 6 inhibitors</b>                 | Abemaciclib<br><br>Palbociclib                                                                                                     |

|                                                       |                        |
|-------------------------------------------------------|------------------------|
| <b>Anticancer drugs – anti-HER2 drugs<sup>b</sup></b> | Lapatinib              |
|                                                       | Pertuzumab             |
|                                                       | Trastuzumab            |
|                                                       | Trastuzumab deruxtecan |
|                                                       | Trastuzumab emtansine  |
| <b>Endocrine therapies<sup>c</sup></b>                | Anastrozole            |
|                                                       | Exemestane             |
|                                                       | Fulvestrant            |
|                                                       | Letrozole              |
|                                                       | Medroxyprogesterone    |
|                                                       | Tamoxifen              |
|                                                       | Toremifene             |

<sup>a</sup>Included in the CFS analysis. For the intravenous CFS analysis, drugs administered orally were excluded (i.e., capecitabine, doxifluridine, olaparib, tegafur/gimeracil/oteracil, and tegafur/uracil).

<sup>b</sup>Used as a surrogate for “HER2+”. Patients in this category were removed to define the “HER2-” population.

<sup>c</sup>Used as a surrogate for “HR+”.

CDK = cyclin-dependent kinase; CFS = chemotherapy-free survival; HER2+ = human epidermal growth factor receptor 2-positive; HER2- = human epidermal growth factor receptor 2-negative; HR+ = hormone-receptor-positive; nab = nanoparticle-albumin-bound

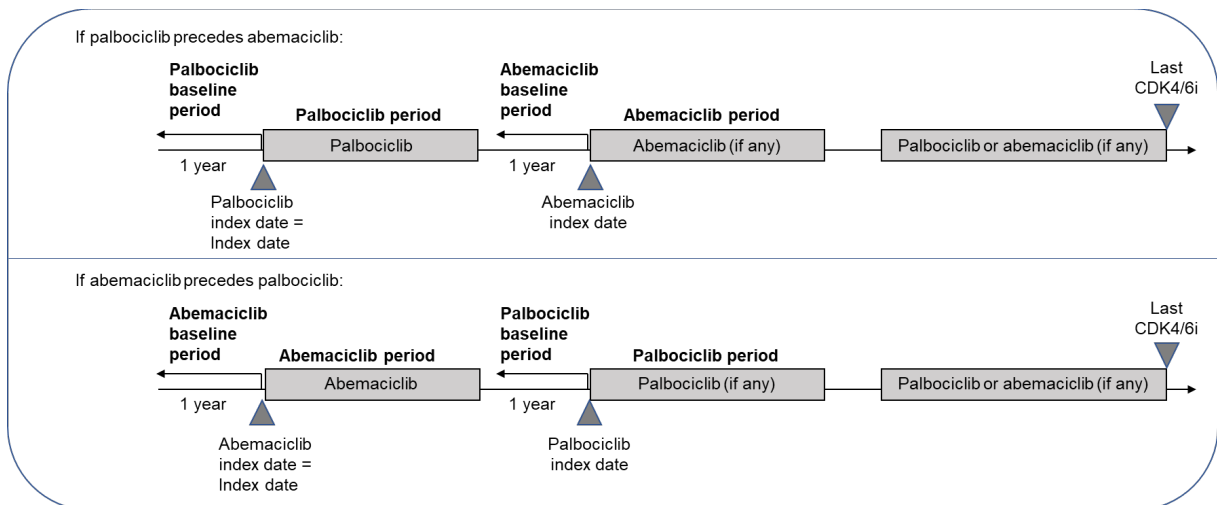

**Online Resource 2. Data analysis periods for subcohorts.** Schematic depicting data analysis periods for the subcohorts, inclusive of potential multiple episodes of CDK4 and 6 inhibitor therapies. Data analysis periods (“palbociclib period” or “abemaciclib period”) started at the first prescription of any CDK4 and 6 inhibitor (the index date) and ended on the last projected dose date (last prescription date plus the number of days of drug supply – 1) for that CDK4 and 6 inhibitor. If more than one CDK4 and 6 inhibitor was used, periods were defined for each, starting on the index date for the first period of CDK4 and 6 inhibitor use and extending to the last projected dose date or one day before the start of the subsequent CDK4 and 6 inhibitor, whichever occurred first.

CDK = cyclin-dependent kinase; CDK4/6i = CDK4 and 6 inhibitor.

**Online Resource 3. Age distribution of patients**

| <b>Age at index date,<br/>years, n (%)</b> | <b>CDK4/6i cohort<br/>N=6442</b> |
|--------------------------------------------|----------------------------------|
| 25-29                                      | 4 (0.1)                          |
| 30-34                                      | 25 (0.4)                         |
| 35-39                                      | 105 (1.6)                        |
| 40-44                                      | 295 (4.6)                        |
| 45-49                                      | 579 (9.0)                        |
| 50-54                                      | 733 (11.4)                       |
| 55-59                                      | 761 (11.8)                       |
| 60-64                                      | 855 (13.3)                       |
| 65-69                                      | 1085 (16.8)                      |
| 70-74                                      | 1013 (15.7)                      |
| 75-79                                      | 576 (8.9)                        |
| 80-84                                      | 288 (4.5)                        |
| 85-89                                      | 96 (1.5)                         |
| 90-                                        | 27 (0.4)                         |

CDK4/6i = cyclin-dependent kinase 4 and 6 inhibitor

**Online Resource 4. Treatment history up to 5 years prior to the index date**

| <b>CDK4/6i cohort</b>           |               |
|---------------------------------|---------------|
| <b>Treatment, n (%)</b>         | <b>N=6442</b> |
| <b>Total</b>                    | 6442 (100)    |
| <b>Any radiotherapy</b>         | 1303 (20.2)   |
| LINAC                           | 1293 (20.1)   |
| Electromagnetic thermal therapy | 6 (0.1)       |
| Gamma knife                     | 12 (0.2)      |
| Particle beam                   | 0             |
| SAVI                            | 0             |
| Whole-body radiation            | 0             |
| <b>Any endocrine therapy</b>    | 4970 (77.2)   |
| Fulvestrant                     | 2395 (37.2)   |
| Letrozole                       | 2066 (32.1)   |
| Tamoxifen                       | 1575 (24.5)   |
| Anastrozole                     | 1351 (21.0)   |
| Exemestane                      | 985 (15.3)    |
| Toremifene                      | 488 (7.6)     |
| Medroxyprogesterone acetate     | 202 (3.1)     |
| <b>Any anticancer drug</b>      | 2619 (40.7)   |
| Cyclophosphamide                | 1226 (19.0)   |
| Paclitaxel                      | 1009 (15.7)   |
| Bevacizumab                     | 775 (12.0)    |
| Epirubicin                      | 750 (11.6)    |
| Eribulin                        | 626 (9.7)     |
| Tegafur/gimeracil/oteracil      | 607 (9.4)     |
| Docetaxel                       | 588 (9.1)     |
| Capecitabine                    | 549 (8.5)     |
| Everolimus                      | 435 (6.8)     |
| Fluorouracil                    | 376 (5.8)     |
| Doxorubicin                     | 180 (2.8)     |
| Vinorelbine                     | 141 (2.2)     |
| nabPTX                          | 132 (2.1)     |
| Gemcitabine                     | 116 (1.8)     |
| Tegafur/uracil                  | 76 (1.2)      |
| Doxifluridine                   | 42 (0.7)      |
| Methotrexate                    | 23 (0.4)      |
| Irinotecan                      | 13 (0.2)      |
| Olaparib                        | 12 (0.2)      |
| Carboplatin                     | 11 (0.2)      |
| Cisplatin                       | 4 (0.1)       |
| Mitoxantrone                    | 1 (0.0)       |

CDK4/6i = cyclin-dependent kinase 4 and 6 inhibitor; LINAC = linear accelerator; nabPTX = nanoparticle-albumin-bound paclitaxel; SAVI = strut-adjusted volume implant.

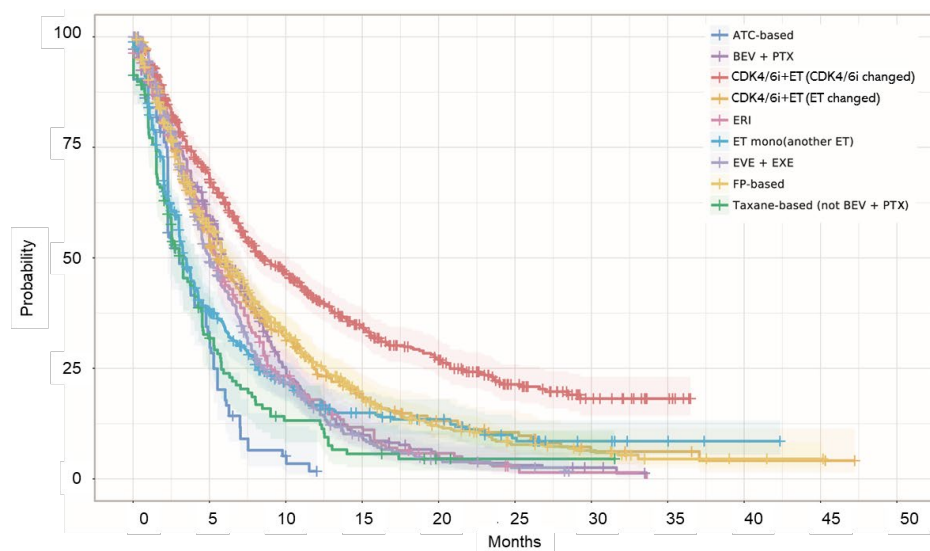

**Time to discontinuation**

| First subsequent therapy     | n   | Events | Median (months) | 95% CIs   |
|------------------------------|-----|--------|-----------------|-----------|
| ATC-based                    | 94  | 84     | 3.0             | 2.3, 4.8  |
| BEV+PTX                      | 359 | 290    | 6.0             | 5.5, 7.0  |
| CDK4/6i+ET (CDK4/6i changed) | 748 | 464    | 8.5             | 7.6, 10.3 |
| CDK4/6i+ET (ET changed)      | 407 | 296    | 5.5             | 5.0, 6.6  |
| ERI                          | 272 | 229    | 5.5             | 5.0, 6.3  |
| ET monotherapy (another ET)  | 432 | 330    | 3.4             | 3.1, 3.8  |
| EVE+EXE                      | 431 | 344    | 5.0             | 4.5, 5.8  |
| FP-based                     | 659 | 506    | 6.0             | 5.6, 7.0  |
| Taxane-based (not BEV+PTX)   | 138 | 118    | 3.3             | 2.5, 4.3  |

**Numbers at Risk**

| Time (months)                | 0   | 5   | 10  | 15  | 20 | 25 | 30 | 35 | 40 | 45 | 50 |
|------------------------------|-----|-----|-----|-----|----|----|----|----|----|----|----|
| ATC-based                    | 94  | 28  | 4   | 0   | 0  | 0  | 0  | 0  | 0  | 0  | 0  |
| BEV+PTX                      | 359 | 187 | 65  | 25  | 10 | 6  | 3  | 0  | 0  | 0  | 0  |
| CDK4/6i+ET (CDK4/6i changed) | 748 | 465 | 251 | 137 | 89 | 43 | 19 | 6  | 0  | 0  | 0  |
| CDK4/6i+ET (ET changed)      | 407 | 193 | 91  | 40  | 22 | 14 | 6  | 4  | 2  | 2  | 0  |
| ERI                          | 272 | 140 | 50  | 20  | 8  | 2  | 1  | 0  | 0  | 0  | 0  |
| ET monotherapy (another ET)  | 432 | 136 | 59  | 32  | 25 | 13 | 6  | 3  | 1  | 0  | 0  |
| EVE+EXE                      | 431 | 188 | 67  | 22  | 8  | 4  | 0  | 0  | 0  | 0  | 0  |
| FP-based                     | 659 | 341 | 161 | 76  | 40 | 20 | 13 | 4  | 2  | 1  | 0  |
| Taxane-based (not BEV+PTX)   | 138 | 37  | 14  | 6   | 2  | 1  | 1  | 0  | 0  | 0  | 0  |

**Online Resource 5. Time to discontinuation of the first subsequent therapy (CDK4/6i cohort).** Kaplan Meier plots of TTD of the first therapy prescribed after the first CDK4 and 6 inhibitor. The “CDK4/6i + ET (CDK4/6i changed)” category includes patients prescribed CDK4 and 6 inhibitor/ET combination regimens who subsequently either initiated a different CDK4 and 6 inhibitor with the same ET or both a different CDK4 and 6 inhibitor and a different ET.

ATC = anthracycline; BEV = bevacizumab; CDK = cyclin-dependent kinase; CDK4/6i = CDK4 and 6 inhibitor; CI = confidence interval; ERI = eribulin; ET = endocrine therapy; EVE = everolimus; EXE = exemestane; FP = fluoropyrimidine; PTX = paclitaxel; TTD = time to discontinuation

**Online Resource 6. First subsequent therapy regimens after removal of patients who were prescribed prior metastatic breast cancer drugs except for fulvestrant<sup>a</sup>**

| <b>CDK4/6i cohort</b>                                                 |               |
|-----------------------------------------------------------------------|---------------|
| <b>First subsequent therapy, n (%)</b>                                | <b>N=4523</b> |
| Patients who initiated a subsequent therapy                           | 2453 (54.2)   |
| CDK4 and 6 inhibitor + ET (CDK4 and 6 inhibitor changed) <sup>b</sup> | 523 (21.3)    |
| FP-based                                                              | 457 (18.6)    |
| EVE + EXE                                                             | 311 (12.7)    |
| ET mono (another ET)                                                  | 310 (12.6)    |
| CDK4 and 6 inhibitor + ET (ET changed)                                | 272 (11.1)    |
| BEV + PTX                                                             | 220 (9.0)     |
| ERI                                                                   | 146 (6.0)     |
| Others                                                                | 89 (3.6)      |
| Taxane-based (not BEV + PTX)                                          | 70 (2.9)      |
| ATC-based                                                             | 55 (2.2)      |

n (%) shown.

<sup>a</sup>Metastatic breast cancer drugs included capecitabine, gemcitabine, S-1, irinotecan, vinorelbine, nab-paclitaxel, bevacizumab, eribulin, everolimus, palbociclib, abemaciclib, and olaparib.

Fulvestrant is indicated for metastatic breast cancer but was not removed in this analysis because it can be used in earlier lines of therapy.

<sup>b</sup>Category includes patients who were prescribed CDK 4 and 6 inhibitor/ET combination regimens who subsequently either initiated a different CDK4 and 6 inhibitor with the same ET or both a different CDK4 and 6 inhibitor and a different ET.

ATC = anthracycline; BEV = bevacizumab; CDK = cyclin-dependent kinase; CDK4/6i = CDK4 and 6 inhibitor; ERI = eribulin; ET = endocrine therapy; EVE = everolimus; EXE = exemestane; FP = fluoropyrimidine; PTX = paclitaxel.



**Online Resource 7. Time to discontinuation of therapy and chemotherapy-free survival in the CDK4/6i cohort after removal of patients who were prescribed prior metastatic breast cancer drugs except for fulvestrant<sup>a</sup>**

| <b>Time-to-event measure</b>                                    | <b>Patients (N)</b> | <b>Events (n)</b> | <b>Median (months)</b> | <b>95% CIs (months)</b> |
|-----------------------------------------------------------------|---------------------|-------------------|------------------------|-------------------------|
| TTD, first CDK4 and 6 inhibitor therapy <sup>b</sup>            | 4523                | 2921              | 12.0                   | 11.3, 12.7              |
| TTD, first subsequent therapy <sup>b</sup>                      | 2453                | 1734              | 6.1                    | 5.8, 6.5                |
| TTD, overall breast cancer drugs (from index date) <sup>c</sup> | 4523                | 1296              | NA                     | 42.7, NA                |
| CFS <sup>d</sup>                                                | 4261                | 1668              | 26.9                   | 25.1, 28.6              |
| Intravenous CFS <sup>e</sup>                                    | 4261                | 1321              | 36.5                   | 34.2, 38.5              |

Treatment regimens were defined as the combination of breast cancer drugs that were prescribed within the first 21 days of each line of therapy. The line of therapy ended when the patient either: 1) terminated all the breast cancer drugs in the regimen (end date: date of last prescription plus the number of days of supply - 1 day); or 2) added a new breast cancer drug that was not included in the regimen (i.e., causing the treatment line to advance), whichever occurred first.

<sup>a</sup>Metastatic breast cancer drugs included capecitabine, gemcitabine, tegafur/gimeracil/oteracil (S-1), irinotecan, vinorelbine, nab-paclitaxel, bevacizumab, eribulin, everolimus, palbociclib, abemaciclib, and olaparib. Fulvestrant is indicated for metastatic breast cancer but was not removed in this analysis because it can be used in earlier lines of therapy.

<sup>b</sup>Patients were considered to be continuing the line and were censored at the last administration date of the line if there were  $\leq 90$  days between the end of the line and the end of data without a subsequent line of therapy.

<sup>c</sup>Patients with  $\leq 90$  days between the estimated last dose of breast cancer drugs and end of data were censored for therapy duration at the last dose, as such patients were likely to be on treatment at the last visit.

<sup>d</sup>Time from the CDK4 and 6 inhibitor index date to the date of first chemotherapy use or death. If no events occurred, patients were censored at the last hospital visit record. Only patients without chemotherapy in the 1-year baseline period were included in the analysis.

<sup>e</sup>Time from the CDK4 and 6 inhibitor index date to the date of first intravenous chemotherapy use or death. If no events occurred, patients were censored at the last hospital visit record. Only patients without chemotherapy in the 1-year baseline period were included in the analysis.

CDK = cyclin-dependent kinase; CDK4/6i = CDK4 and 6 inhibitor; CFS = chemotherapy-free survival; CI = confidence interval; MBC = metastatic breast cancer; NA = not available; TTD = time to discontinuation.

**Online Resource 8. Concomitant therapy and monitoring tests during first CDK4 and 6 inhibitor therapy (abemaciclib and palbociclib subcohorts)**

| <b>n (%)</b>                 | <b>Abemaciclib<br/>N=1380</b> | <b>Palbociclib<br/>N=2964</b> |
|------------------------------|-------------------------------|-------------------------------|
| <b>Concomitant therapies</b> |                               |                               |
| Pain killers                 | 758 (54.9)                    | 1621 (54.7)                   |
| Denosumab                    | 599 (43.4)                    | 1330 (44.9)                   |
| Bisphosphonate               | 107 (7.8)                     | 257 (8.7)                     |
| Antidiarrheal agents         | 1273 (92.3)                   | 235 (7.9)                     |
| Probiotics                   | 797 (57.8)                    | 312 (10.5)                    |
| Antiemetics                  | 573 (41.5)                    | 680 (22.9)                    |
| Liver protection drugs       | 114 (8.3)                     | 148 (5.0)                     |
| Systemic steroids            | 162 (11.7)                    | 230 (7.8)                     |
| Thrombolytic drugs           | 180 (13.0)                    | 312 (10.5)                    |
| <b>Monitoring tests</b>      |                               |                               |
| Liver enzyme test            | 1376 (99.7)                   | 2952 (99.6)                   |
| Peripheral blood test        | 1168 (84.6)                   | 2632 (88.8)                   |
| Scintigram                   | 153 (11.1)                    | 302 (10.2)                    |
| SPECT                        | 2 (0.1)                       | 7 (0.2)                       |
| CT                           | 947 (68.6)                    | 1909 (64.4)                   |
| PET                          | 16 (1.2)                      | 19 (0.6)                      |
| PET-CT                       | 58 (4.2)                      | 165 (5.6)                     |
| MRI                          | 250 (18.1)                    | 548 (18.5)                    |
| PET-MRI                      | 0                             | 0                             |
| Mammography                  | 19 (1.4)                      | 58 (2.0)                      |
| Simple radiography           | 683 (49.5)                    | 1141 (38.5)                   |

Only patients who continued treatment for  $\geq 30$  days and then discontinued abemaciclib/palbociclib were eligible for this analysis.

CT = computed tomography; MRI = magnetic resonance imaging; PET = positron emission tomography; SPECT = single-photon emission computerized tomography.
